# Supplementary material for: Increased drought tolerance in plants engineered for low lignin and low xylan content
Source: PubMed Central journal article supplement (PMC6050699; doi:10.1186/s13068-018-1196-7), 2018-07-18
Supplement: 13068_2018_1196_MOESM1_ESM.pdf [file 13068_2018_1196_MOESM1_ESM.pdf]

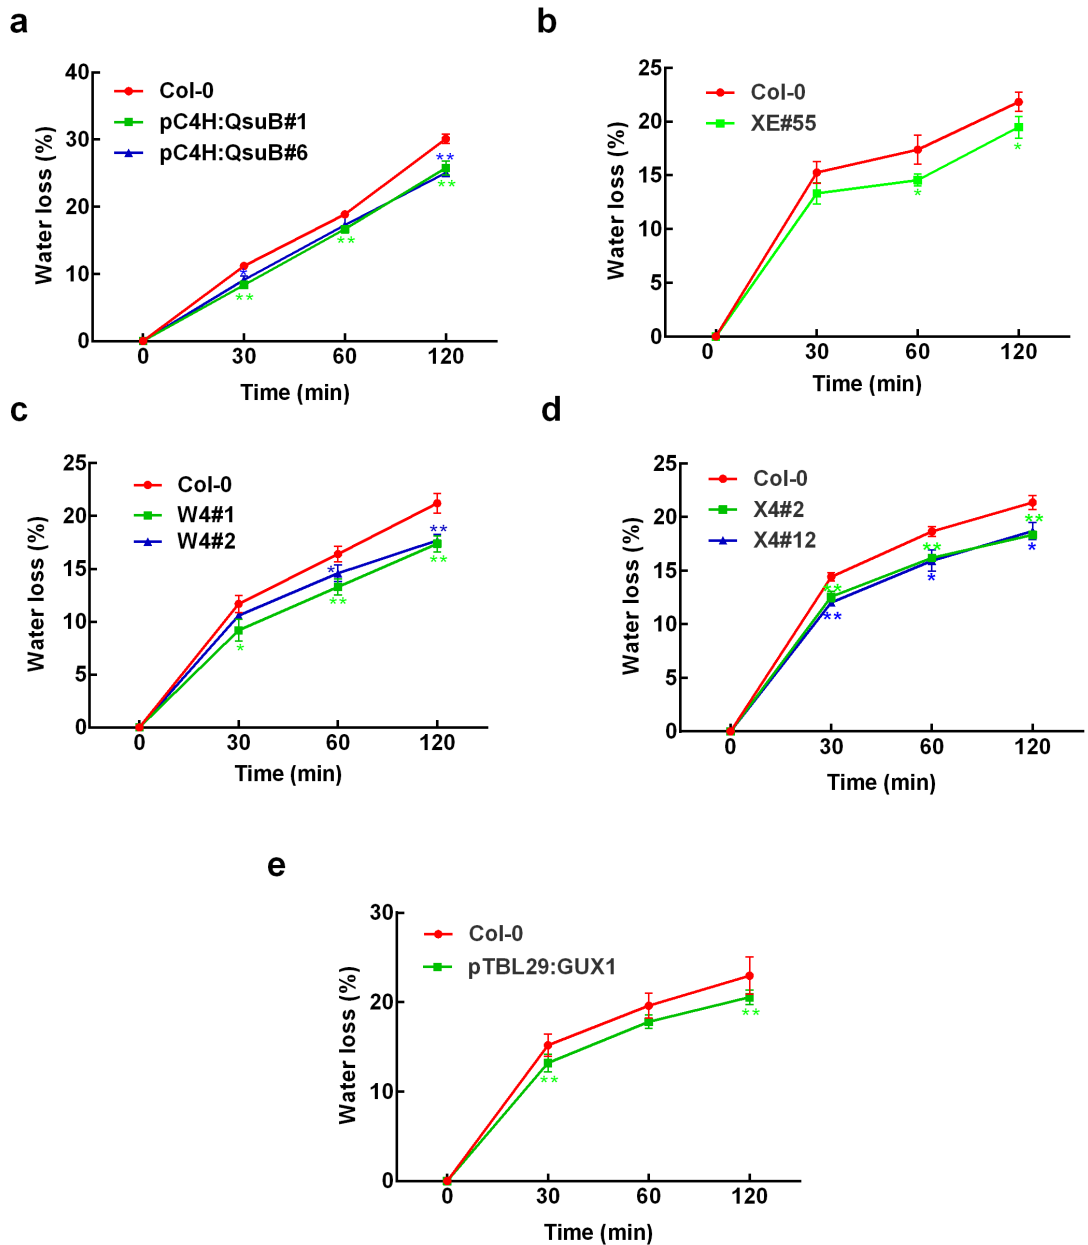

**Additional File 1.** The rate of water loss from detached rosettes. Rosettes were obtained from four-week-old plants and placed at a laboratory bench (approximately 50% relative humidity). Weight loss was calculated based on the initial mass. Values show average  $\pm$  SD ( $n > 3$ ). Asterisks indicate significant differences from the wild type using Student's t-test (\* $P < 0.05$ ; \*\* $P < 0.01$ ).
