# Supplementary material for: Increased drought tolerance in plants engineered for low lignin and low xylan content
Source: PubMed Central journal article supplement (PMC6050699; doi:10.1186/s13068-018-1196-7), 2018-07-18
Supplement: 13068_2018_1196_MOESM3_ESM.pdf [file 13068_2018_1196_MOESM3_ESM.pdf]

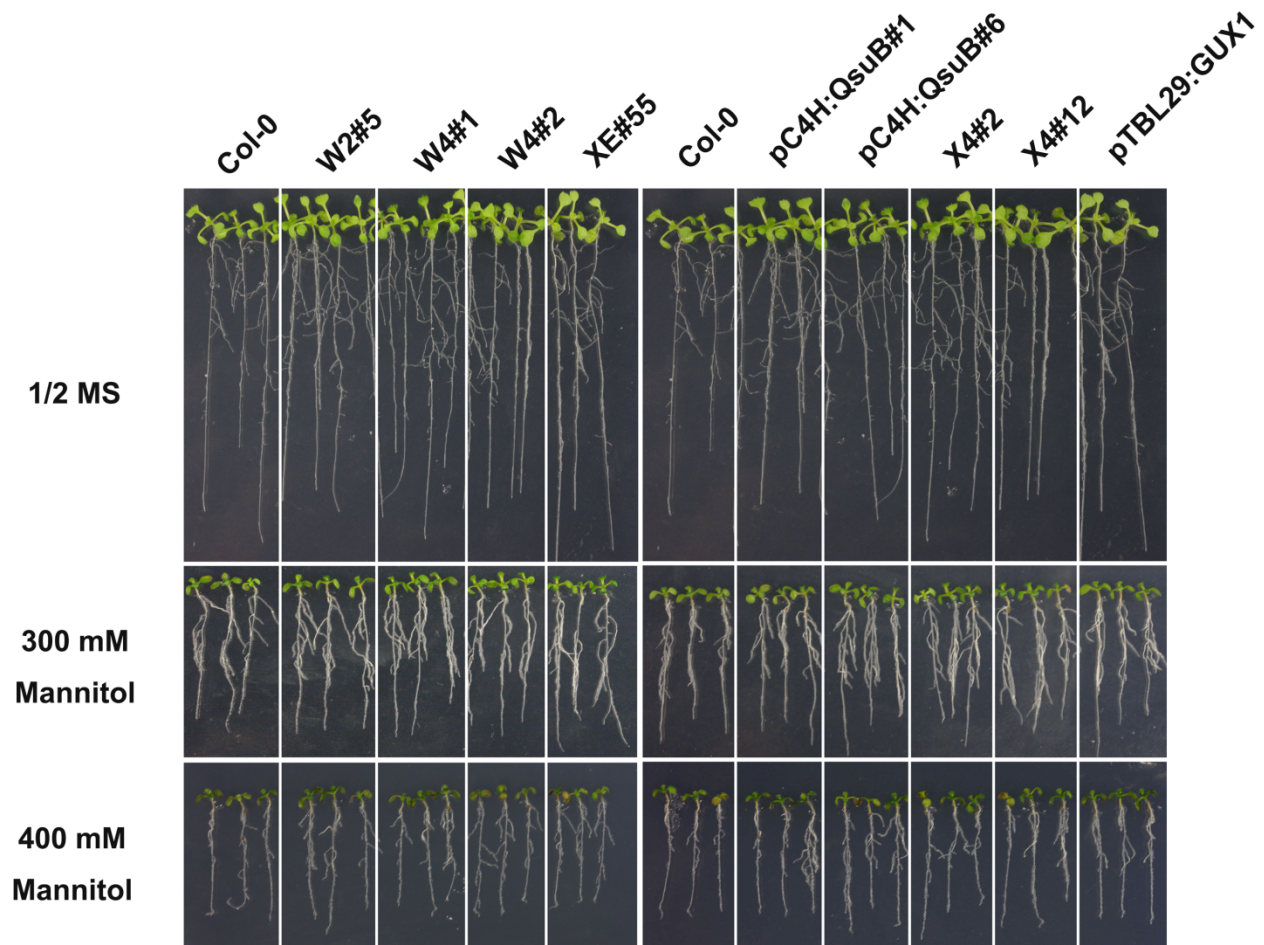

**Additional File 3.** Growth of seedlings under osmotic stress. Five-day-old seedlings grown in 1/2 MS medium containing 2% sucrose were transferred to 1/2 MS medium, supplemented with or without different concentrations of mannitol for ten days. The experiment was repeated at least three times. All the engineered plants showed root growth similar to wild-type plants under these conditions.
