# Supplementary material for: Increased drought tolerance in plants engineered for low lignin and low xylan content
Source: PubMed Central journal article supplement (PMC6050699; doi:10.1186/s13068-018-1196-7), 2018-07-18
Supplement: 13068_2018_1196_MOESM4_ESM.pdf [file 13068_2018_1196_MOESM4_ESM.pdf]

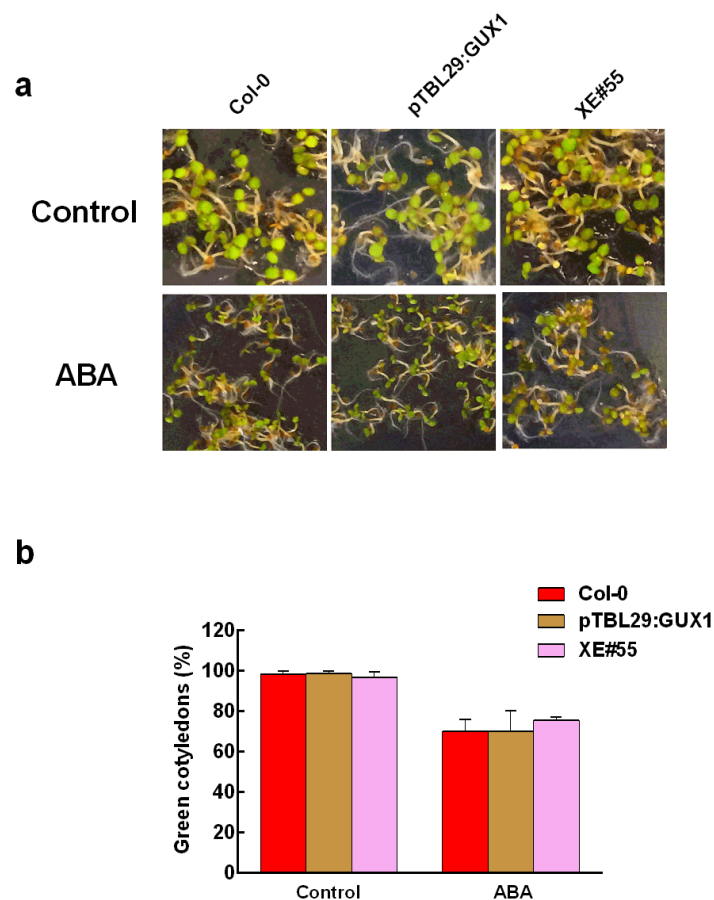

**Additional File 4.** Germination of engineered plants with low xylan acetylation and low xylan content in response to 0.5  $\mu\text{M}$  ABA. (a) The wild-type and engineered plants were sowed on 1/2 MS medium containing 0 and 0.5  $\mu\text{M}$  ABA. Photographs were taken after six days of growth. (b) The percentage of seedlings with green cotyledons was measured after six days. Values show average  $\pm$  SD. Each experiment included at least 100 seeds, and three independent experiments were conducted. The engineered plants do not show any significant differences compared to wild type.
