# Supplementary material for: Increased drought tolerance in plants engineered for low lignin and low xylan content
Source: PubMed Central journal article supplement (PMC6050699; doi:10.1186/s13068-018-1196-7), 2018-07-18
Supplement: 13068_2018_1196_MOESM5_ESM.pdf [file 13068_2018_1196_MOESM5_ESM.pdf]

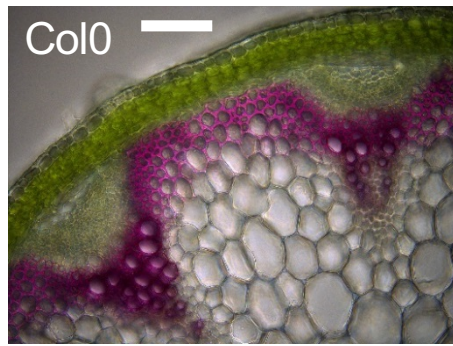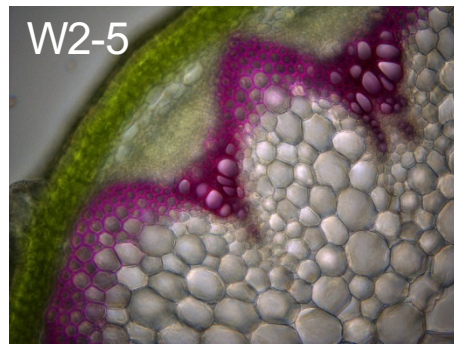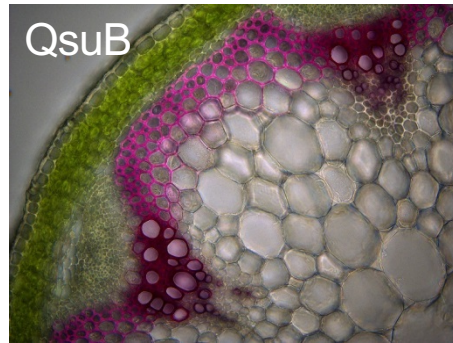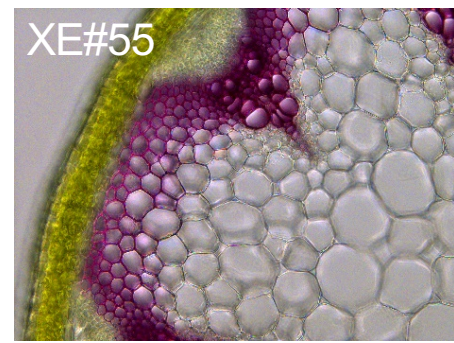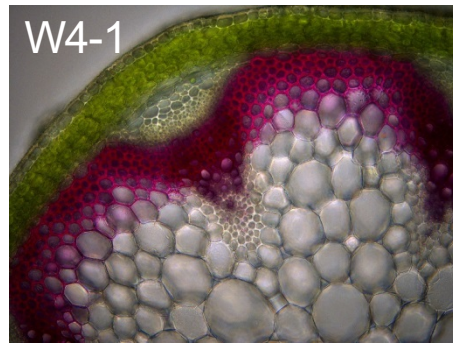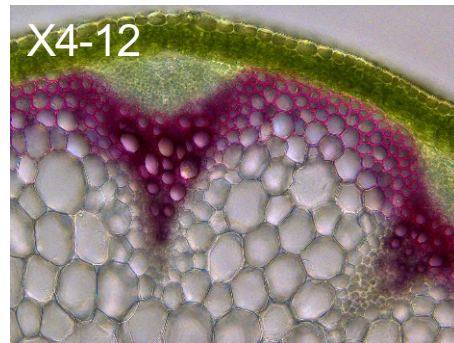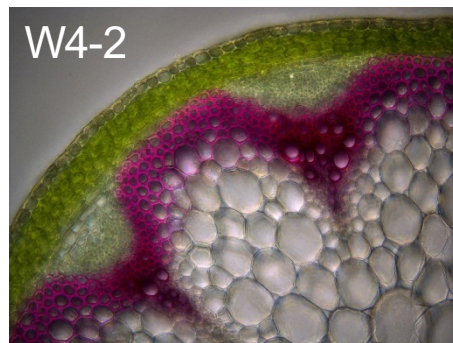

**Additional File 5.** Stem cross-sections of wild-type and engineered plants. The sections were stained with phloroglucinol-HCl, which stains lignin. Unlike many lignin and xylan mutants, none of the engineered plants exhibit irregular xylem. Scale bar 0.1 mm.
